# Supplementary material
Source: PubMed Central journal article supplement (PMC3383623)
Supplement: NIHMS48843-supplement-supplementary_data.pdf [file NIHMS48843-supplement-supplementary_data.pdf]

## Supplemental Information

### Supplementary Materials and Methods

#### Transwell assay

Exponentially growing cells were seeded in transwell chambers with 8  $\mu\text{m}$  pore size (BD Biosciences, Franklin Lakes, NJ, USA) at a density of  $4 \times 10^4$  per well in medium with 5% FCS and treated for 72 h with FGF2 or FGF5 (20 ng/ml) or a combination of FGF2 and FGF5 (100 ng/ml each). Cells at the bottom of the lower chamber were fixed in methanol and stained with crystal violet. Staining was quantified with Lucia software (Nikon). Assays were performed in duplicates and repeated three times.

#### Growth curve

Melanoma cells were seeded in 6-well plates at a density of  $1 \times 10^5$  cells per well in medium with 10% FCS and 24 h later transduced with adenoviruses expressing dnFGFR1, dnFGFR3, dnFGFR4 or GFP (used as control). Cell number was determined 2 and 5 days after transduction with a Casy cell counter (Roche Innovatis AG, Bielefeld, Germany). Triplicate counts of three independent experiments were performed.

#### Anchorage independent growth

Melanoma cells were transduced with dnFGFR1 or GFP and seeded in soft agar (1% agar in growth medium with 10% FCS) at a density of  $3 \times 10^4$  cells per well of a 6-well plate. Number of clones was determined microscopically after 2 weeks. Experiments were performed in duplicates and repeated three times.

### Western blot analysis

For analysis of the activity of the dn receptor construct, cells were seeded into 6-well plates at a density of  $5 \times 10^4$  cells/well. After 24 hours they were transduced with dnFGFR1 or GFP adenovirus and cultured for 5 days. For analysis of the effects of PD166866 and sorafenib, cells were grown to 80% confluence in six-well plates and treated with the inhibitors for 6 h in medium with 5% FCS. Cells were harvested in a buffer containing 50 mM Hepes pH 7.5, 150 mM NaCl, 10% glycerol, 1 mM EDTA, 10 mM NaF, 0.5 mM  $\text{Na}_3\text{VO}_4$ , 1% Triton X 100, 1.5 mM  $\text{MgCl}_2$ , and protease inhibitors (Complete, Roche). Proteins were separated by polyacrylamide gel electrophoresis and blotted onto PVDF membranes (GE Healthcare). Membranes were incubated with primary antibodies at 4°C overnight. HRP-conjugated secondary antibodies (Dako, Denmark) and Western C reagent (Biorad) were used for blot development. For a list of antibodies and dilutions see Table S4.

### Flow cytometry

For analysis of cell cycle distribution, cells were grown to 80% confluence in T25 flasks and treated with PD166866 and sorafenib for 18 h in medium with 5% FCS. Cells were fixed in ethanol, treated with 50 µg/ml RNase A, stained with 50 µg/ml propidium iodide (PI) and analysed on a FACSCalibur flow cytometer with Modfit LT software (Verity Software House).

### Apoptosis assay

Cells were seeded into 24-well plates at a density of  $5 \times 10^4$  cells/well and treated with PD166866 and sorafenib for 48 h in medium with 5% FCS. Cells were double stained with Hoechst 333258 (5 µg/ml) and PI (2 µg/ml) and percentages of viable and apoptotic cells were determined microscopically.

Supplementary Table S1: FGF transcript expression in melanoma cell lines and normal melanocytes

(NM)

|              | NM       | Cell Lines (%) |              | NM       | Cell Lines (%) |
|--------------|----------|----------------|--------------|----------|----------------|
| <b>FGF1</b>  | <b>+</b> | <b>83</b>      | <b>FGF12</b> | <b>-</b> | <b>75</b>      |
| <b>FGF2</b>  | <b>+</b> | <b>92</b>      | <b>FGF13</b> | <b>+</b> | <b>100</b>     |
| <b>FGF3</b>  | <b>-</b> | <b>0</b>       | <b>FGF14</b> | <b>+</b> | <b>58</b>      |
| <b>FGF4</b>  | <b>-</b> | <b>0</b>       | <b>FGF16</b> | <b>+</b> | <b>58</b>      |
| <b>FGF5</b>  | <b>-</b> | <b>75</b>      | <b>FGF17</b> | <b>-</b> | <b>0</b>       |
| <b>FGF6</b>  | <b>-</b> | <b>0</b>       | <b>FGF18</b> | <b>+</b> | <b>100</b>     |
| <b>FGF7</b>  | <b>-</b> | <b>0</b>       | <b>FGF19</b> | <b>-</b> | <b>0</b>       |
| <b>FGF8</b>  | <b>-</b> | <b>25</b>      | <b>FGF20</b> | <b>-</b> | <b>25</b>      |
| <b>FGF9</b>  | <b>-</b> | <b>0</b>       | <b>FGF21</b> | <b>+</b> | <b>42</b>      |
| <b>FGF10</b> | <b>-</b> | <b>0</b>       | <b>FGF22</b> | <b>+</b> | <b>67</b>      |
| <b>FGF11</b> | <b>+</b> | <b>100</b>     | <b>FGF23</b> | <b>-</b> | <b>50</b>      |

Supplementary Table S2: Nucleotide sequences of the primer pairs used for detection of FGFR variants

| Target     | Primer Sequence                                         |
|------------|---------------------------------------------------------|
| FGFR1 IIIb | 5-TCCAGTGGCTAAAGCACATC-3<br>5-CCGCATCCGAGCTATTAATC-3    |
| FGFR1 IIIc | 5-GACAAAGAGATGGAGGTGCT-3<br>5-GTTGTAGCAGTATTCCAGCC-3    |
| FGFR2 IIIb | 5-AACGGGAAGGAGTTTAAGCAG-3<br>5-CTCGGTCACATTGAACAGAG-3   |
| FGFR2 IIIc | 5-AACGGGAAGGAGTTTAAGCAG-3<br>5-TGGCAGAACTGTCAACCATGC-3  |
| FGFR3 IIIb | 5-AACGGCAGGGAGTTCCGCGGC-3<br>5-CCCGTCCCGCTCCGACACATTG-3 |
| FGFR3 IIIc | 5-AACGGCAGGGAGTTCCGCGGC-3<br>5-CCCGGCGTCCTCAAAGGTG-3    |
| FGFR4      | 5-TGCCTGGGCCTCCAGTCTTG-3<br>5-CTGCAGCTGGACAGCGGAAC-3    |
| GAPDH      | 5-CTGGCGTCTTCACCACCAT-3<br>5-CTGGCGTCTTCACCACCAT-3      |

Supplementary Table S3: Taqman assays used for qRT-PCR. All assays were obtained from Applied Biosystems.

| Target               | Assay                                           |
|----------------------|-------------------------------------------------|
| FGFR1                | Hs00915135 m1                                   |
| FGFR2                | Hs01552926 m1                                   |
| FGFR3                | Hs00179829 m1<br>Hs00997397 m1                  |
| FGFR4                | Hs00608751 g1<br>Hs00242558 m1<br>Hs00608744 g1 |
| FGF2                 | Hs00960934 m1                                   |
| FGF5                 | Hs00170454 m1<br>Hs00738132 m1                  |
| FGF18                | Hs00826077 m1                                   |
| Beta 2 microglobulin | Hs99999907 m1                                   |
| 18S RNA              | Hs99999901 s1                                   |

Supplementary Table S4: Primary antibodies used for immunoblotting.

| Target          | Type              | Supplier                  | Number      | Dilution |
|-----------------|-------------------|---------------------------|-------------|----------|
| Caspase 3       | Rabbit polyclonal | Cell Signaling Technology | #9662       | 1:1000   |
| Cleaved PARP    | Rabbit polyclonal | Cell Signaling Technology | #9541       | 1:1000   |
| Beta actin      | Mouse monoclonal  | Sigma                     | Clone AC-15 | 1:5000   |
| pAkt (Ser 473)  | Rabbit polyclonal | Cell Signaling Technology | #9271       | 1:1000   |
| Akt             | Rabbit polyclonal | Cell Signaling Technology | #9272       | 1:1000   |
| pERK1/2         | Rabbit polyclonal | Cell Signaling Technology | #9101       | 1:1000   |
| ERK1/2          | Rabbit polyclonal | Cell Signaling Technology | #9102       | 1:1000   |
| pStat3 (Ser727) | Rabbit polyclonal | Cell Signaling Technology | #9134       | 1:1000   |
| Stat3           | Rabbit polyclonal | Cell Signaling Technology | #9132       | 1:1000   |

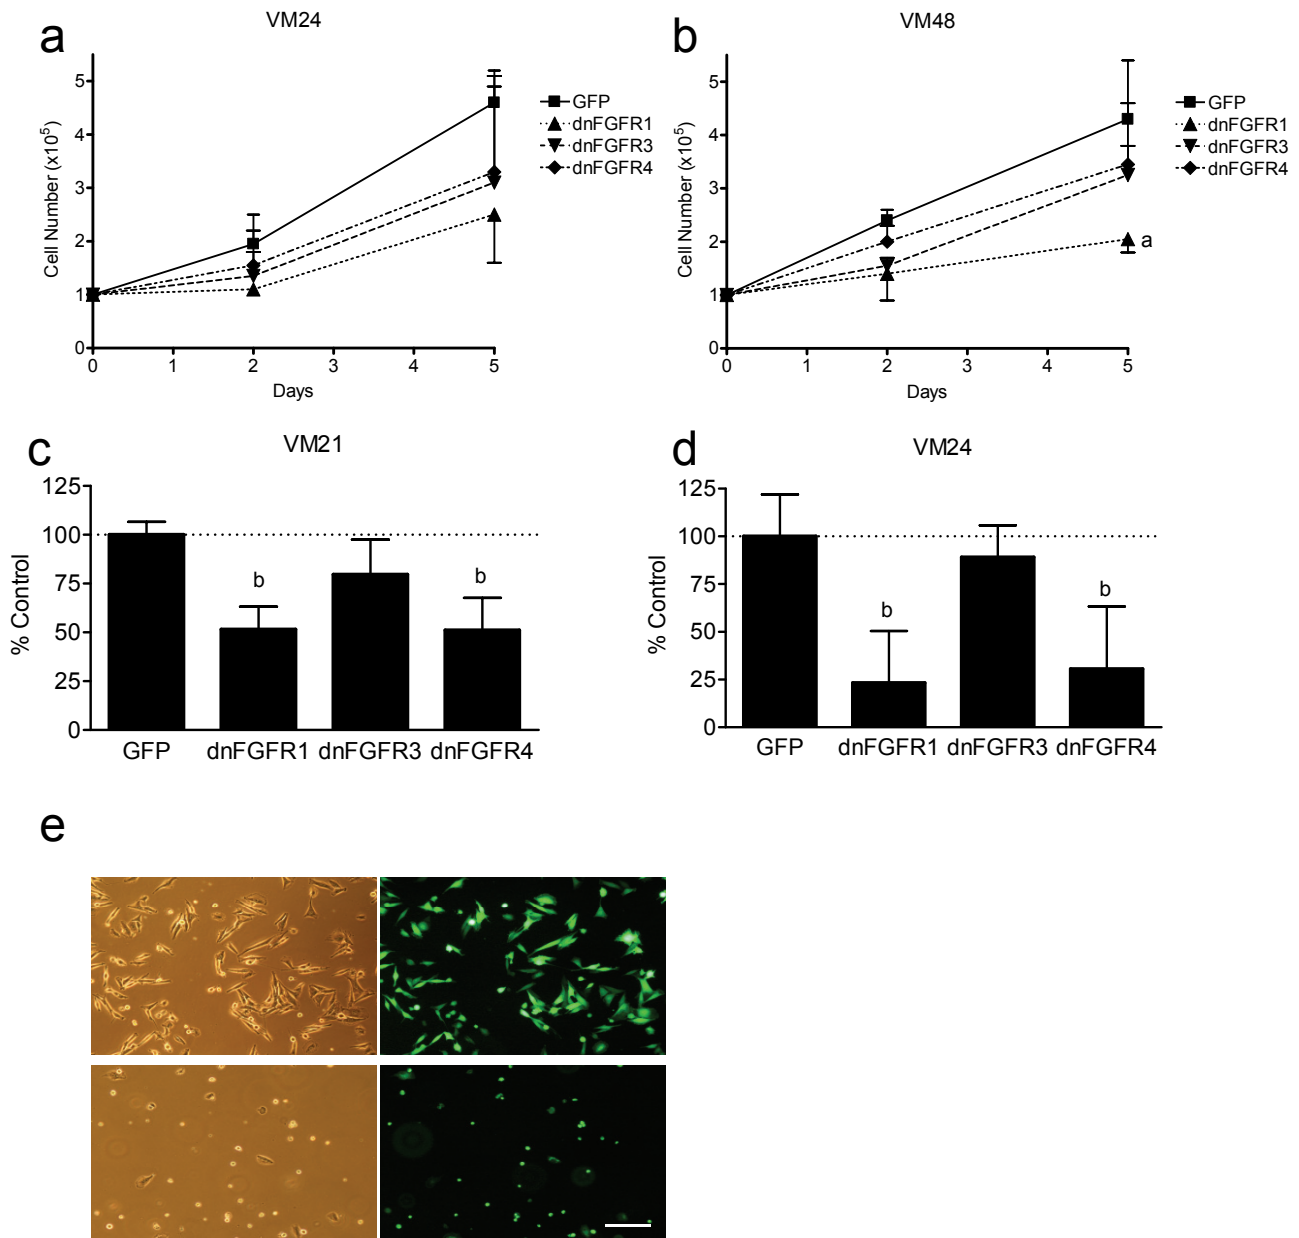

**Figure S1: DnFGFR expression impairs melanoma cell growth and induces cell death.** (a, b) VM24 and VM48 cells were transduced with dnFGFR1, dnFGFR3, dnFGFR4, or GFP adenovirus. Cell number was determined after 2 and 5 days. (c, d) For clonogenic assays VM21 and VM28 cells were transduced as above and the number of colonies was determined after 14 days. a,  $p < 0.05$ ; b,  $p < 0.01$  versus control (GFP). (e) VM1 cells were seeded in 6-well plates and transduced with GFP (upper panels) or dnFGFR1 (lower panels). Cells were reseeded and photographed after 5 days with phase contrast (left panels) and GFP (right panels) filter settings. Scale bar represents 50  $\mu$ m.
